1 **ZIKA VIRUS INFECTION DURING PREGNANCY AND INDUCED BRAIN PATHOLOGY**  
2 **IN BECLIN1-DEFICIENT MOUSE MODEL.**

3

4 Mohan Kumar Muthu Karuppan<sup>1</sup>, Chet Raj Ojha<sup>1</sup>, Myosotys Rodriguez<sup>1</sup>, Jessica Lapierre<sup>1</sup>, M. Javad  
5 Aman<sup>3</sup>, Fatah Kashanchi<sup>2</sup>, Michal Toborek<sup>4</sup>, Madhavan Nair<sup>1</sup> and Nazira El-Hage<sup>1\*</sup>

6

7 1: Department of Immunology and Nanomedicine, Herbert Wertheim College of Medicine, Florida  
8 International University, Miami, FL 33199, USA

9 2: National Center for Biodefense and Infectious Diseases, George Mason University, Manassas, VA,  
10 20110, USA

11 3: Integrated biotherapeutics (IBT), Rockville, MD, 20850, USA

12 4: Department of Biochemistry and Molecular Biology, University of Miami Miller School of  
13 Medicine, Miami, FL 33136, USA.

14

15

16

17 \* Correspondence: Dr. Nazira El-Hage, Department of Immunology and Nanomedicine, Florida  
18 International University, Herbert Wertheim College of Medicine, Miami, FL 33199, USA; E-mail  
19 address: nelhage@fiu.edu; Phone: (305)-348-4346; FAX: (305)-348-1109.

20

21

22

23

24

25 **ABSTRACT**

26 We investigated the role of the autophagy protein, Beclin1, in the replication and disease of Zika virus  
27 (ZIKV) in pregnant dams and their offspring using Beclin1-deficient ( $Atg6^{+/-}$ ) and wild-type ( $Atg6^{+/+}$ )  
28 mouse model infected with the Honduran (R103451), Puerto Rican (PRVABC59), and the Uganda  
29 (MR766) strains of ZIKV. Pregnant dams infected subcutaneously at embryonic stage (E)9 showed  
30 viral RNA in serum harvested at E13 and in various organs removed postmortem at E17.  
31 Subcutaneous infections with ZIKV also showed the vertical transmission of ZIKV from the placenta  
32 to embryos removed postmortem at E17. From the three isolates, R103451-infected  $Atg6^{+/-}$  dams had  
33 the lowest mortality rate while 30 % of their offspring containing the hemizygous beclin1 allele ( $Atg6^{+/-}$ )  
34 were smaller in size and had smaller and underdeveloped brain. Growth impairment in the pups  
35 became noticeable after two weeks post-birth. After 21-days, pups were sacrificed and brain tissues  
36 removed postmortem showed expression of the envelope (E) and the non-structural (NS)-1 proteins,  
37 along with signs of neuronal injury, despite an absence in viral RNA detection. A significant  
38 decrease in the mRNA expression levels of the insulin-like growth factor-1 (IGF-1) by 8-fold and a  
39 decrease in the mRNA expression levels of several microcephaly related genes along with an increase  
40 in the secretion of several inflammatory molecules may have contributed to the observed phenotype.  
41 Since autophagy regulates cytokines and chemokines production, a dysregulation in this pathway may  
42 have further exacerbated the pathology of ZIKV.

43

44 **Keywords:** Zika virus, autophagy-deficient mouse-model, Beclin1, microcephaly, inflammatory  
45 molecules, growth factor.

## 46 **IMPORTANCE**

47 Pups delivered from ZIKV-infected dams showed significant growth impairments in the body and the  
48 brain. We believe that the reduction in insulin growth factor together with the increase secretion of  
49 inflammatory molecules may have triggered neuronal injury and the downregulation of the  
50 microcephalic genes, while reduced expression of the autophagy protein, Beclin1 further exacerbated  
51 the pathology. Although the mechanism is still unknown, the autophagy pathway seems to play a  
52 key role in ZIKV pathology. It is therefore of great significance to study the role of autophagy during  
53 viral infection with the goal to identify potential targets for anti-ZIKV therapeutic intervention.

54

## 55 **INTRODUCTION**

56 Zika virus (ZIKV) is a neurotropic flavivirus primarily transmitted by the *Aedes* mosquito (1-3).  
57 Individuals infected with the virus typically develop mild symptoms, although *in utero*, ZIKV  
58 exposure can cause congenital malformations including microcephaly (4, 5), and or other overt  
59 congenital abnormalities including fetal death, placental insufficiency, fetal growth restriction and  
60 central nervous system injury (6). Microcephaly is a neurodevelopmental disorder, characterized by a  
61 reduced head size when compared to babies of the same sex and age. The significant reduction in  
62 brain size, accompanied by intellectual disability, is believed to be caused by impaired cell  
63 proliferation and the death of cortical progenitor cells and their neuronal progeny (7). Significant  
64 downregulations of microcephaly-associated genes were detected in ZIKV-related studies (8-10),  
65 suggesting a direct mechanistic link of ZIKV infection to microcephaly. Twelve of the microcephalin  
66 (MCPH) loci (MCPH1-MCPH12) have been mapped (11) with many of these genes encoding for  
67 proteins localized at the centrosome or associated with centrosomal-related activities which play an  
68 important role in cell cycle progression, cell division and formation of the mitotic spindle (12).

69         Recently we have shown that ZIKV can modulate the autophagy pathway in glia (astrocytes  
70 and microglia) with silencing of the autophagy gene, *beclin1*, leading to increased inflammation in  
71 ZIKV-infected glia (13). Beclin1 is a component of the phosphatidylinositol 3-kinase nucleation  
72 complex which regulates the initiation stages of the autophagy pathway (14). Here we confirm our  
73 previous results using a translatable animal model. The *Atg6<sup>+/-</sup>* mice expresses about 60% less  
74 Beclin1 protein (15) and serves as a valuable tool to analyze the function of Beclin1. We report for  
75 the first time that three different phylogenetic strains including the Honduran-R103451, Puerto Rican-  
76 PRVABC59 and the Uganda-MR766 strain of ZIKV infect the *Atg6<sup>+/-</sup>* and *Atg6<sup>+/+</sup>* pregnant dams.  
77 High mortality was detected in *Atg6<sup>+/+</sup>* dams infected with MR766 when compared to dams infected  
78 with the Honduran-R103451 and the Puerto Rican-PRVABC59 strains, while R103451-infected  
79 animals showed the highest survival rate. Impaired growth in body and brain sizes were visible in 30

80 % of offspring born to R103451-infected *Atg6*<sup>+/-</sup> dams, with no evidence of viral RNA in serum or  
81 brain removed at day-21 postnatal, albeit viral proteins were expressed in brain tissues. Significant  
82 reduction in IGF-1 along with signs of neuronal injury were detected in the brain of these pups.  
83 Furthermore, a significant downregulation in the expression levels of several microcephalic genes  
84 were evident, although decreased expression levels were also detected in brains of pups exposed to  
85 MR766 and PRVABC59 *in utero*.

86

## 87 **MATERIALS AND METHODS**

### 88 *Viral propagation*

89 Vero cells (CRL-1586), mosquito cell line C6/36 (CRL-1660), Honduran-R103451 (VR-1848) ZIKV,  
90 Puerto Rican-PRVABC59 (VR-1843) ZIKV and the Uganda-MR766 (VR84) ZIKV were procured  
91 from American Type Culture Collection (ATCC, Manassas, VA, USA). Vero cells or C6/36 were  
92 infected at multiplicity of infection (MOI) of 0.01 for propagation as described previously (13).

93

### 94 *Ethics statement*

95 Animal work was conducted in accordance with the guidelines of the National Institutes of Health  
96 Guide for the Care and Use of Laboratory Animals. Animal experiments and associated protocols  
97 were reviewed and approved by the Florida International University Institutional Animal Care and  
98 Use Committee (IACUC).

99

### 100 *Animal model and timed pregnancy*

101 *Atg6*<sup>+/-</sup> (stock # 018429) mice and *Atg6*<sup>+/+</sup> (stock # 000664) wild-type were procured from The  
102 Jackson Laboratory (Bar Harbor, ME, USA) and bred in the animal facility at Florida International  
103 University. For the timed-pregnancy studies, male and female mice aged 8 to 15 weeks were kept in  
104 isolation for at least 24 hours prior to mating. Males and females were placed together in the early  
105 evening and monitored periodically for up to 48 hours until the detection of a vaginal plug. The day  
106 plug was observed was considered embryonic or gestational day zero (E0). Pregnant dams received  
107 anti-interferon receptor 1 (anti-IFNAR1) monoclonal antibody (MAR-5A3, Leinco Technologies,  
108 MO, USA) at 2mg/animal via intraperitoneal (ip) route at gestational day 8 followed by subcutaneous  
109 (sc) infection with individual strain of ZIKV at 10<sup>3</sup> plaque forming unit (PFU) in 50μL of PBS or  
110 mock (PBS) injection at gestational day of E9. Booster dose of anti-IFNAR1 at 0.5mg/animal dose  
111 was administered by ip at 2- and 4-days post-infection (dpi). At E13 (four days after ZIKV  
112 challenge), maternal blood was collected, and serum was prepared after coagulation and  
113 centrifugation. At E17, organs from dams (brain, liver, heart and spleen) placenta and fetuses were

114 recovered. Organs were weighed and homogenized using a bead-beater apparatus (MagNA Lyser,  
115 Roche, Indianapolis). At E20-E21, pups delivered were monitored for growth and weight changes for  
116 up to 3 weeks of age.

117

#### 118 *Real Time PCR*

119 Viral RNA from serum and cellular RNA from tissues collected at various time-points from both  
120 ZIKV-infected and uninfected animals were extracted using QIAamp Viral RNA mini kit and RNeasy  
121 mini kit respectively (Qiagen, Valencia, CA, USA). The extracted RNA was amplified by iTaq  
122 universal SYBR Green one-step PCR kit (Bio-Rad, Hercules, CA, USA) and 10 $\mu$ M primers (Sigma-  
123 Aldrich, MO, USA). Expression of microcephalin-1 (MCPH1), WD repeat containing protein 62  
124 (WDR62), cancer susceptibility candidate 5 (CASC5), and the abnormal spindle like primary  
125 microcephaly (ASPM) were measured using 500 ng of RNA extracted from pup brains. A standard  
126 curve was prepared from a 10-fold dilution of previously quantified ZIKV stock solution with known  
127 titer and viral titer expressed as Viral RNA (using standard curve). RT<sup>2</sup> Profiler<sup>TM</sup> PCR Array Mouse  
128 Autophagy was purchased from Qiagen (Catalog # PAMM-084Z). RNA extracted from the brain of  
129 pups born to infected dams were analyzed for the expression of autophagy-related genes following the  
130 manufacturer's instruction and as previously described (13).

#### 131 *Primer sequences*

##### 132 *ZIKV:*

133 Forward: 5'-CCGCTGCCCAACACAAG-3'

134 Reverse: 5'-CCACTAACGTTCTTTTGCAGACAT-3'

##### 135 *MCPH1:*

136 Forward 5'- AAGAAGAAAAGCCAACGAGAACA-3'

137 Reverse 5'-CTCGGGTGCGAATGAAAAGC-3'

##### 138 *ASPM:*

139 Forward 5'-CCGTACAGCTTGCTCCTTGT-3'

140 Reverse 5'-GGCGTTGTCCAATATCTTTCCA-3'

##### 141 *CASC5:*

142 Forward 5'-TCGCTGAAGTGGAAACAGAAAC-3'

143 Reverse 5'-TATCTGAGCAAGGGTCTCTGCG-3'

##### 144 *WDR62:*

145 Forward 5'-GCTGACAAATGGCAAGCTG-3'

146 Reverse 5'-GATGGTCTTGAGGGGTTCCCT-3'

147

148 *Hematoxylin & Eosin*

149 After three weeks of age, pups were sacrificed, and brain tissues removed postmortem were  
150 embedded in optimal cutting temperature (OCT) compound. Cryostat sectioned slices of 5-micron  
151 thickness were stained with hematoxylin and eosin (H&E) as described previously (16). Images were  
152 acquired using an inverted fluorescence microscope with a 560 Axiovision camera and 20X and 40X  
153 objectives (Zeiss, Germany).

154

155 *Murine mixed glial cell culture*

156 For primary murine glial culture, postnatal day 4-6 (P4-P6)  $Atg6^{+/-}$  and  $Atg6^{+/+}$  littermates were  
157 separated according to phenotypic coat color and sacrificed according to IACUC guidelines as  
158 described previously (17, 18). Cells seeded in 6 well plates were infected with ZIKV at MOI of 0.1  
159 or treated with ZIKV envelope (E) and the non-structural protein (NS)-1 proteins. Viral proteins were  
160 purchased from ImmunoDx, Woburn, MA, USA. The protein concentration used (50nM) was based  
161 on a dose response curve and concentrations reported in cerebral spinal fluid (CSF) of patients with  
162 flavivirus infection (19). Since viral proteins were resuspended in PBS after purification with aqueous  
163 solvent, PBS was used as a negative control.

164

165 *ELISA*

166 Cell culture supernatants (pre-cleared by brief centrifugation) were used to measure the levels of  
167 interleukin (IL)-6, monocyte chemotactic protein-1 (MCP-1), regulated on activation, normal T cell  
168 expressed and secreted (RANTES) and tumor necrosis factor alpha (TNF- $\alpha$ ) by ELISA (R&D  
169 Systems, Minneapolis, MN, USA) according to the manufacturer's instructions. The optical density  
170 (O.D.) was read at A450 on a Synergy HTX plate reader (BioTek, Winooski, VT, USA).

171

172 *Plaque Assay*

173 Vero cells were infected with a 10-fold dilution of ZIKV stock or the supernatants from  
174 infected/treated cells. After 1-hour adsorption cells were washed with PBS. Cells were overlaid with  
175 culture media (EMEM supplemented with 2% FBS) containing equal volume of 3.2%  
176 carboxymethylcellulose and incubated for 5 days at 37°C. Cells were fixed and stained with 1%  
177 crystal violet solution prepared in 20% formaldehyde, 30% ethanol and 50% PBS for 1 hour. Stained  
178 cells were washed with water to remove excess crystal violet, left to dry overnight, and lysis plaques  
179 were quantified by stereomicroscope (Zeiss). The viral titer was expressed as plaque forming units  
180 (PFU) per ml of the stock (13)

181

182 *Immunohistochemistry*

183 ZIKV infectivity was measured by fluorescent immunolabeling as described by Ojha et al. (13).  
184 Briefly, cells and brain tissue sections were fixed in 4% paraformaldehyde, permeabilized with 0.1%  
185 Triton X-100, and blocked in 10% milk/0.1% goat serum. Sections were immunolabeled with the  
186 neuronal marker, mouse anti-MAP2 (microtubules associated protein 2) antibody (Cat. MAB378,  
187 Millipore, Boston, MA, USA), anti-ZIKV-E antibody (Cat. GTX133314) and anti-ZIKV-NS1  
188 antibody (Cat. GTX133307, Genetex, CA, USA). Immunoreactivity was visualized with secondary  
189 antibodies from Molecular Probes (Carlsbad, CA, USA). 4',6-diamidino-2-phenylindole (DAPI) was  
190 used to label cell nuclei. Images were analyzed using an inverted fluorescence microscope with a 560  
191 Axiovision camera (Zeiss).

192

193 *Western Blotting*

194 Protein was extracted from postmortem brain tissues of both Atg6<sup>+/+</sup> and Atg6<sup>+/-</sup> animals using RIPA  
195 buffer (Thermo Scientific, Waltham, MA, USA) supplemented with a mixture of protease and  
196 phosphatase inhibitors followed by SDS-PAGE protein separation. Immunoblots were labeled with  
197 primary antibodies against Beclin1 – 1:500 (Novus Biologicals, NB500–249), ATG5 – 1:200 (Novus  
198 Biologicals, NB110-53818), LC3-B – 1:1000 (Novus Biologicals, NB600–1384), P62/SQSTM1–  
199 1:500 (Novus Biologicals, NBP1–48320) and  $\beta$  actin (Cat. sc-47778, 1:200) (Santa Cruz  
200 Biotechnology, Santa Cruz, CA, USA) was used as internal control. Immunoblots were subsequently  
201 incubated with secondary antibodies conjugated to horseradish peroxidase (Millipore, Billerica, MA,  
202 USA), exposed to SuperSignal West Femto Substrate (Thermo Scientific) and visualized using a  
203 ChemiDoc imaging system (Bio-Rad,). Densitometric analysis was quantitatively measured using  
204 image J (NIH.gov).

205

206 *Statistical analysis*

207 Results are reported as mean  $\pm$  SEM of 3-5 independent experiments. Data were analyzed using  
208 analysis of variance (ANOVA) followed by the post hoc test for multiple comparisons (GraphPad  
209 Software, Inc., La Jolla, CA, USA). An alpha level (p-value) of < 0.05 was considered significant.

210

211 **RESULTS**

212 ***Pregnant Atg6<sup>+/+</sup> and Atg6<sup>+/-</sup> dams transiently immunosuppressed are susceptible to ZIKV infection.***

213 We explored the role of Beclin1 in ZIKV infection and disease using timed-pregnant Beclin1  
214 deficient (Atg6<sup>+/-</sup>) and wild-type (Atg6<sup>+/+</sup>) mice model. For the *in vivo* studies, genotype of each  
215 animal strain was confirmed by PCR (15) followed by detection of protein expression levels by

216 western blotting (Figure 1). Representative immunoblots confirmed a decrease in Beclin1 and LC3-II  
217 expression levels and increased in p62/SQSTM1 levels in tissues extracted from  $Atg6^{+/-}$  mice when  
218 compared to  $Atg6^{+/+}$  mice (Fig. 1A and B). For ZIKV infection, pregnant dams received anti-  
219 interferon receptor 1 (anti-IFNAR1) monoclonal antibody at 2mg/animal via intraperitoneal (ip) route  
220 at gestational day 8 followed by subcutaneous (sc) infection with individual strain of ZIKV at  $10^3$   
221 plaque forming unit (PFU) in 50 $\mu$ L of PBS or mock (PBS) injection at gestational day of E9. To  
222 confirm infection, serum was removed at gestation day E13 (4 days post-infection) and viral RNA  
223 was measured by RT-PCR. Viral RNA levels in the range of  $10^3$  PFU/mL were detected in serum of  
224  $Atg6^{+/+}$  and  $Atg6^{+/-}$  dams infected with ZIKV-R103451 and ZIKV-MR766, while infection with  
225 ZIKV- PRVABC59 showed significantly lower viral RNA levels in serum of  $Atg6^{+/-}$  dams when  
226 compared to  $Atg6^{+/+}$  dams (Fig. 1D). The weight of each pregnant animal was measured before the  
227 detection of a vaginal plug and throughout the gestation period. Increases in body weight served as a  
228 measurable indicator of pregnancy among dams (Fig. 1E). As expected, Beclin1 deficient ( $Atg6^{+/-}$ )  
229 animals showed less gain in body weight compared to wild-type ( $Atg6^{+/+}$ ) dams. This was likely  
230 because  $Atg6^{+/-}$  delivered fewer pups when compared to  $Atg6^{+/+}$  dams, since litter numbers delivered  
231 by  $Atg6^{+/-}$  dams (crossed with an  $Atg6^{+/-}$  sire) are controlled by their genetic background. Within a  
232 litter, approximately 50% of the pups delivered are heterozygous for the beclin1 gene ( $Atg6^{+/-}$ ).  
233 These animals have an agouti coat color which is believed to be a result of the effect of the *Becn1*  
234 mutation on melanogenesis. 25% of the pups delivered are homozygous for the beclin1 gene  
235 ( $Atg6^{+/+}$ ) with a black coat color, while homozygous deletion of the targeted allele results in  
236 embryonic lethality (~25%). Litter numbers ranged between 5 to 7 pups for  $Atg6^{+/-}$  and between 6 to 9  
237 pups for  $Atg6^{+/+}$  per litter. Linear regression models (based on weight change from day (0)  
238 demonstrated that maternal weight gain at day 11 was a significant predictor of litter size (Fig. 1E).  
239 At E17 (8 days post-infection), maternal placenta and other organs removed postmortem from  $Atg6^{+/+}$   
240 and  $Atg6^{+/-}$  dams, showed a high level of viral RNA in the placenta, followed by the spleen, liver,  
241 heart and the lowest titer was detected in the brain, irrespective of mice strain. The low level of viral  
242 RNA detected in the brain is indicative that ZIKV can cross the blood brain barrier (Fig. 1F). The  
243 survival rates in pregnant dams' post-infection with ZIKV was also monitored for the duration of  
244 gestation and showed no significant differences between mock (PBS) and ZIKV-R103451 infected  
245  $Atg6^{+/+}$  dams when compared to similar treated  $Atg6^{+/-}$  dams (Fig. 1G). On the contrary, increased  
246 fatality was observed in animals infected with ZIKV-MR766 and to lesser extent in  $Atg6^{+/-}$  dams  
247 infected with ZIKV-PRVABC59 (Fig. 1G). Despite the high mortality rate detected in dams infected  
248 with ZIKV-MR766 when compared to dams infected with ZIKV-R103451, similar levels of viral  
249 RNA were detected in serum and organs recovered at E17, suggesting that different viral isolates



250 exhibit different pathogenicity. Because of the high mortality among dams infected with ZIKV-  
251 MR766, we sought to confirm whether the observed mortality was caused by ZIKV or because of  
252 animal strain. Infection using AG129 mice lacking receptors for both Type I and Type 2 IFN, infected  
253 with increasing doses ( $10^1$ ,  $10^2$ ,  $10^3$  and  $10^4$  PFU/ml) of ZIKV-MR766 showed an infection-dose  
254 dependent decrease in survival rate of the mice, confirming that mortality was probably due to viral  
255 infection and not necessarily due to mouse genotype. (Fig. 1H). Overall, the data shows significant  
256 infection throughout gestation in both Beclin1 ( $Atg6^{+/-}$ ) deficient and wild-type ( $Atg6^{+/+}$ ) pregnant  
257 dams infected with three different strains of virus. The data also shows that among the three isolates,  
258 ZIKV-MR766 is more lethal irrespective of mouse genotype.

259

### 260 ***Growth impairment in pups exposed to ZIKV-R103451 in utero***

261 Subcutaneous infections in pregnant dams with ZIKV on E9 and embryo harvested after eight days on  
262 E17 showed the vertical transmission of ZIKV from the placenta to the fetus (Fig. 2A). It is  
263 important to note that at E17, a period of neurogenesis, no noticeable growth abnormality was  
264 observed in fetuses, irrespective of animal strains or viral phylogeny (data not shown). At E20-E21,  
265 pups born to mock (PBS) and ZIKV-infected  $Atg6^{+/+}$  and  $Atg6^{+/-}$  dams were monitored for up to 21-  
266 days for mortality and for morphological abnormalities. A slight decrease in the survival rate of pups  
267 born to ZIKV-R103451-infected  $Atg6^{+/+}$  and  $Atg6^{+/-}$  dams was noted when compared to mock-  
268 infected animals (Fig. 2B), while the survival rate in pups born to ZIKV-PRVABC59 and ZIKV-  
269 MR766-infected dams were considerably low (Fig. 2B). In fact, greater than 80% of pups born to  
270 ZIKV-MR766-infected dams died after 2 days postnatal (Fig. 2B; middle panel). In Fig 2C (top  
271 panel) is illustrated a representative image of a litter born to ZIKV-R103451-infected  $Atg6^{+/-}$  dam that  
272 consisted of both  $Atg6^{+/+}$  (black) and  $Atg6^{+/-}$  (agouti) pups. Within a litter, the smaller pup is  
273 indicated by a circle at day 7 and with an arrow at day 10. Fourteen days post-birth, growth  
274 abnormalities became exceedingly visible by differences in body size and was detected in 1 of every 4  
275 (25-30%) pups. Genotyping confirmed that the small pups were heterozygous for the *beclin1* gene  
276 (data not shown). The average body weight was approximately 6.93 gm (Fig. 2C; top chart) and the  
277 average body length was around 5.38 cm (Fig. 2C, bottom chart). After 21 days, both small and  
278 typical sized pups were sacrificed, and brains were removed for further analysis. Representative  
279 images of 3-week-old pups born from ZIKV-R103451-infected (top) and mock (bottom) infected  
280 dams are shown in Fig. 2D. Respective skull and brain images are shown on the right-hand side.  
281 Brain recovered from the small pups born to ZIKV-R103451-infected dams are labeled 3 and 4, while  
282 brain recovered from the typical sized pups born to ZIKV-R103451-infected dams are labeled 1 and  
283 2. Brain recovered from the typical sized pups born to mock-infected dams are labeled 5-8. The

284 weight (in milligram) of each brain determined by a balance is represented in a bar graph (Fig. 2E:  
285 top) and in a chart (Fig. 2E: bottom). As expected, the smaller brains weigh less than the well-defined  
286 brains. Except for one pup born to a ZIKV-PRVABC59-infected dam, no significant growth  
287 abnormalities were measured in pups born to dams infected with ZIKV-PRVABC59 or ZIKV-  
288 MR766, irrespective of murine strains (data not shown). Overall, the data shows a growth  
289 dysfunction in pups born to ZIKV-R103451 that was reflected in body weight, body length and brain  
290 weight parameters. The impairment in body growth along with the abnormal brain morphology was  
291 higher among pups born to  $Atg6^{+/-}$  mice infected with ZIKV-R103451, suggesting a potential function  
292 of Beclin1 in growth development.

293

### 294 ***Dysregulation of autophagy exacerbates the pathology in pups exposed to ZIKV-R103451 in utero***

295 Potential causal factor(s) responsible for the growth impairment detected in pups born to ZIKV-  
296 R103451-infected  $Atg6^{+/-}$  dams was further explored. After three weeks, pups born to ZIKV-infected  
297 or mock-exposed dams were sacrificed and brains removed postmortem were snap-frozen in liquid  
298 nitrogen for further use. Half of the brain hemisphere was used for ELISA and RT-PCR while the  
299 other half of the brain was used for imaging analysis. Sections of the frontal cortex from brain  
300 recovered postmortem in  $Atg6^{+/-}$  pup were used for immunofluorescent imaging (Fig. 3A); similar  
301 staining pattern were detected in sections closer to the center of the brain (data not shown). Although  
302 viral RNA was not detected by RT-PCR (data not shown), immunofluorescent double labeling with  
303 antibodies against the neuronal marker, MAP2 (labeled in red) and ZIKV proteins (labeled in green)  
304 showed expression of NS1 (Fig. 3A; left bottom panel) and the structural E protein (Fig. 3A; right  
305 bottom) in brain tissues recovered from  $Atg6^{+/-}$  pups born to ZIKV-infected dams. Brain tissues  
306 recovered from  $Atg6^{+/-}$  pups born to mock-exposed dams showed no fluorescent labeling with NS1 or  
307 E antibodies (Fig. 3A; top panels). Microscopic appearance of brain stained with H&E showed no  
308 visible sign of aberrant morphology of neurons in mock-exposed brain tissues removed postmortem  
309 (Fig. 3B; left panel). In contrast, brain tissues recovered from  $Atg6^{+/-}$  pups born to ZIKV-infected  
310 dams showed signs of necrotic neurons with shrunken neuronal cell bodies (Fig. 3B; right panel). The  
311 other half of the brain hemisphere was minced and used to measure the expression of autophagy-  
312 related genes and growth factors, crucial for neurodevelopment and homeostasis, by RT-PCR. The  
313 insulin-like growth factor-1 (IGF-1), a polypeptide hormone with critical roles in regulating brain  
314 plasticity mechanisms, was reduced by 8-fold in  $Atg6^{+/-}$  pups born to ZIKV-infected dams when  
315 compared to a 4-fold decrease in  $Atg6^{+/+}$  pups born to ZIKV-infected dams (Fig. 3C), suggesting a  
316 potential link between IGF-1 and ZIKV-associated growth impairments. The transmembrane protein  
317 74 (TMEM74), a novel autophagy-related protein, was upregulated by approximately 6-fold in  $Atg6^{+/-}$

318 pups born to ZIKV-infected dams. TMEM74-related autophagy is independent of BECN1/PI3KC3  
319 complex, which may explain the reason this gene was more expressed in animals lacking the Beclin1  
320 gene and also in the context of our animal model may not be linked to ZIKV exposure (20).  
321 Additional genes involved in the autophagy machinery are also included in the graph, although no  
322 significant differences were detected between  $Atg6^{+/+}$  and  $Atg6^{+/-}$  pups (Fig. 3C). Expression levels  
323 of several microcephaly-related genes previously linked to stillbirth, brain development, and  
324 microcephaly in fetuses, were also measured by RT-PCR (8, 21-23). Gene expression levels of  
325 MCPH1 and ASPM in brain tissues of  $Atg6^{+/-}$  pups born to mock (PBS)-exposed dams were  
326 significantly reduced when compared to  $Atg6^{+/+}$  pups born to mock-exposed dams (Fig. 3D; top  
327 graphs); implying an important role of Beclin1 in growth development. Likewise, expression levels of  
328 MCPH1, ASPM, CASC5 and WDR62 in brain tissues of  $Atg6^{+/-}$  pups born to ZIKV-R103451  
329 infected dams were significantly lower (approximately 2.5 - 3-fold) when compared to  $Atg6^{+/+}$  pups  
330 born to ZIKV-R103451-infected dams (Fig. 3D). Surprisingly, RNA expression levels of the  
331 microcephalic genes MCPH1, ASPM, CASC5, and WDR62 were also decreased in brains removed  
332 from  $Atg6^{+/+}$  and  $Atg6^{+/-}$  pups born to ZIKV-MR766 and ZIKV-PRVABC59-infected dams (data not  
333 shown), despite no growth abnormalities among these pups, suggesting that overt growth impairment  
334 detected in ZIKV-R103451 exposed pups may not be exclusively linked to changes in microcephalic  
335 genes. Overall, the data shows a decrease in the expression of growth factors with visible signs of  
336 necrotic neurons in brain recovered from  $Atg6^{+/-}$  pups; these factors may or may not be associated  
337 with the observed morphological abnormalities.

338

### 339 ***Beclin1 deficiency exacerbates secretion of inflammatory molecules in ZIKV-infected glia in vitro***

340 Since glial cells are the most abundant cell types in the brain and the principal cell types involved in  
341 the release of neuroinflammatory molecules, they are frequently considered the culprit in many viral  
342 pathologies (24-26). To this end, mixed glia (astrocytes and microglia) isolated from whole brain of  
343 either  $Atg6^{+/+}$  or  $Atg6^{+/-}$  pups, as described previously (15), were infected with ZIKV at an MOI of  
344 0.1. Mixed glial cultures were permissive to infection with ZIKV (R103451, PRVABC59, MR766),  
345 albeit more level of infection was detected in  $Atg6^{+/-}$  glia infected with ZIKV-R103451. Fig. 4A,  
346 shows a representative image of glia derived from  $Atg6^{+/+}$  and  $Atg6^{+/-}$  pups infected with ZIKV after  
347 24-hours, followed by immunofluorescent labeling with the antibody against GFAP (red), ZIKV NS1  
348 (green) and DAPI nucleus (blue). Viral infection and PFU were analyzed by plaque assays (Fig. 4B:  
349 top panel) using supernatants collected at various time-points post-infection (Fig. 4B; bottom panel).  
350 Next, the secretion of inflammatory molecules was measured by ELISA using supernatant from non-  
351 infected (media) and ZIKV-infected glia. Infection with ZIKV-MR766 and ZIKV-R103451 and to a

352 lesser extend ZIKV-PRVABC59 caused a significant increase in RANTES, MCP-1 and IL-6 at 24-  
353 hours that was still detected after 48-and 72-hours post-infection (Fig. 4C). At twenty-four-hours  
354 post-infection with ZIKV-R103451, secretion of RANTES was increased by a 2.5-fold, MCP-1 was  
355 increased by a 1.4-fold, and IL-6 was increased by 1.6-fold in supernatant derived from  $Atg6^{+/-}$   
356 infected glial cells when compared to glia derived from  $Atg6^{+/+}$  pups (Fig. 4C). More importantly, the  
357 secretion of MCP-1 in supernatant from  $Atg6^{+/-}$  glia infected with ZIKV-R103451 remained high  
358 throughout the duration of the experiment (Fig. 4C). Since we were able to detect NS1 and E  
359 proteins, in the absence of viral RNA, we posit that expression of these proteins might be the  
360 contributing components toward neuroinflammation. Cultured glia cells were incubated with 50nM of  
361 recombinantly expressed NS1 and E proteins. This concentration was based on a dose response curve  
362 (data not shown) and concentration of proteins reported in the cerebral spinal fluid of patients with  
363 flavivirus infection (19) and in sera of DENV-infected patients (27, 28). As expected, direct exposure  
364 of murine glia to NS1 or the E protein caused a significant secretion in inflammatory molecules, with  
365 the most pronounced effects observed with TNF- $\alpha$  expression in supernatant from  $Atg6^{+/-}$  glia (Fig.  
366 4D). Overall, the data shows infection of ZIKV in murine-derived glia along with the secretion of  
367 inflammatory molecules. Furthermore, high level of viral RNA measured in ZIKV-infected  $Atg6^{+/-}$   
368 glia after 24 and 48-hours post-infection correlates with the increased secretion of inflammatory  
369 cytokines. Findings also point to a potential link between Beclin1 and the regulation of TNF- $\alpha$ , in  
370 response to pathogenic insults, which may also account for the phenotype detected in pups born to  
371 ZIKV infected  $Atg6^{+/-}$  dams.

372

## 373 DISCUSSION

374 In this study, we reported for the first time that three different phylogenetic strains of ZIKV infects  
375 timed-pregnant Beclin1-deficient ( $Atg6^{+/-}$ ) and wild-type ( $Atg6^{+/+}$ ) mouse model (Fig. 1). Impact of  
376 ZIKV infection on dams were detected at E13 in serum and at E17 in placenta and in other organs  
377 removed postmortem with limited viral RNA detected in the brain, despite the use of anti-IFNAR1  
378 mAb (Fig. 1). Low RNA detection in the brain is not unusual, since a report by Cao et. al 2017, also  
379 reported low levels of viral titers (in the range of 10-100 FFU equivalent/g) in fetal brain (29). Except  
380 for one pup born to a ZIKV-PRVABC59-infected dam, no significant growth abnormalities were  
381 measured in pups born to dams infected with ZIKV-PRVABC59 irrespective of murine strains. This  
382 finding was unexpected, since the Honduran and the Puerto Rican strains of ZIKV arose from the  
383 same 2015 outbreak. Placenta recovered from postmortem dams infected with the Honduran strain of  
384 ZIKV showed higher viral RNA levels when compared to the placenta recovered from the ZIKV-  
385 PRVABC59-infected dams (Fig. 1). The low level of placental infection detected in the PRVABC59-

386 infected dams could have contributed to the lack of phenotypic abnormalities detected in the pups.  
387 On the contrary, 30% of pups heterozygous for the *Atg6* gene born to ZIKV-R103451-infected dams  
388 showed growth impairment (Fig. 2). No evidence of viral RNA was detected in 3-week-old pups,  
389 despite evidence of growth impairment (Fig. 2). A lack in viral RNA detection may indicate the  
390 absence of virions or low RNA detection limit by the RT-PCR but also, it should be reminded that  
391 pups did not receive IFNAR mAb postnatal and this could account for the lack of viral detection, as  
392 the normal immune system of the pups may have effectively suppressed viral RNA below the limit of  
393 quantification. It is not unexpected that only viral proteins, but not viral RNA was detected. In fact,  
394 in a panel of patient sera infected with DENV, the NS1 protein was detected even in the absence of  
395 viral RNA or in the presence of immunoglobulin M antibodies. NS1 circulation levels varied among  
396 individuals during the course of the disease, ranging from several ng/mL to several ug/mL (27).  
397 Likewise, presence of viral protein in the absence of viral RNA was reported in serum recovered from  
398 HIV-positive subjects treated with antiretroviral drugs, implying that viral RNA can be suppressed  
399 below detection level, while maintaining detectable protein expression in leaky reservoirs (30).

400 Necrotic neurons were detected in sections of the frontal cortex area in postmortem brain  
401 recovered from 3-week-old pups. Although mechanism(s) mediating growth impairments with ZIKV  
402 infection are still unclear, viral infection itself can damage neural progenitor cells or alternatively,  
403 ZIKV mediated reduction in the expression of microcephaly related genes which are directly involved  
404 in neuronal cell division and proliferation may also contribute to the impairment in brain development  
405 (23, 31). Others have shown that mutations in the human *WDR62* resulted in microcephaly and a wide  
406 spectrum of cortical abnormalities (32-34), while a loss in the *WDR62* protein function in mice  
407 causes mitotic delay, death of neuron progenitor cells, reduced brain size and dwarfism (34). *CASC5*  
408 was shown to be involved in cell cycle and kinetochore formation during metaphase with mutation in  
409 this gene was also implicated in causing microcephaly (35). Using a mouse models of *McpH1*  
410 mutations it was shown that microcephaly can develop due to premature differentiation of neurons  
411 (50). Likewise, gliosis and neuronal necrosis were previously associated with ZIKV infected  
412 microcephalic brain (51, 52). Thus, one possible explanation for the observed morphological changes  
413 in neurons could be related to the decreased expression in microcephalic genes, while attenuated  
414 *Beclin1* expression further exacerbated the pathology. However, a decrease in the expression of  
415 microcephalic genes was also detected in brains of *Atg6*<sup>+/+</sup> pups born to ZIKV-R103451 infected  
416 dams as well as in brains of *Atg6*<sup>+/+</sup> and *Atg6*<sup>+/-</sup> pups born to ZIKV-MR766 and ZIKV-PRVABC59  
417 infected dams, despite no detection of necrotic neurons (data not shown). A significant  
418 downregulation in the expression of the microcephaly related genes, *MCPH1* and *ASPM*, in the  
419 brains of *Atg6*<sup>+/-</sup> but not in *Atg6*<sup>+/+</sup> pups born to mock-exposed dams while expression levels of

420 MCPH1, ASPM, WDR62, and CASC5 were reduced in the brains of  $Atg6^{+/-}$  and  $Atg6^{+/+}$  pups born  
421 to ZIKV-exposed dams, irrespective of viral strain (Fig. 3). Reduction in Beclin1 or impaired  
422 autophagy enhanced ZIKV-R103451 (but not other strains)-mediated pathology in *in-utero* exposed  
423 pups; suggesting a ZIKV strain specific effect of autophagy pathway in associated pathologies.  
424 Beclin1 and the ultraviolet irradiation resistance-associated gene (UVRAG) are involved in both  
425 autophagy and centrosome stability and linked to ZIKV mediated microcephaly (36, 37), while the  
426 recently identified MCPH18, a phosphatidylinositol 3-phosphate-binding protein, functions as a  
427 scaffold protein for autophagic removal of aggregated protein; suggesting a potential link of  
428 autophagy in the development of primary microcephaly (38). Autophagy is a common pathway  
429 involved in regulating the replication of ZIKV as well as other viral-infections in cells of the central  
430 nervous system (13, 17, 39-43). In a related studies published by others, an autophagy-deficient  
431 animal model lacking the *Atg16L* gene showed restricted ZIKV infection in placenta, with reduced  
432 ZIKV-mediated placental damage and reduced adverse fetal outcomes (44). Reduction of *ATG16L1*  
433 expression levels in pregnant dams or placental trophoblastic cells showed limited ZIKV burden  
434 which contradicts our current studies, as we did not detect a decrease in ZIKV infection in dams using  
435 an autophagy-deficient animal model heterozygous for the *Atg6* gene. Although speculative, the  
436 discrepancy between *ATG16L1* and *ATG6* knock down (used in our studies) may relate to the  
437 differential role of the specific protein in the autophagy pathway and how specific steps in autophagy  
438 influence the life cycle and pathology of ZIKV.

439 As for our findings, further studies including gene silencing and protein overexpression are needed to  
440 better understand and decipher the cause and effect of the microcephalic genes in our animal model.  
441 Alternatively, the low expression of IGF-1 detected in postmortem brains of pups heterozygous for  
442 the *Atg6* gene born to ZIKV-R103451-infected dams may have triggered neuronal injury and  
443 subsequently downregulated the microcephalic genes. The IGF system plays a central role in  
444 hormonal growth regulation and is responsible for normal fetal and postnatal growth. For more than  
445 30-years, IGF has been available as a replacement therapy in growth hormone-deficient patients and  
446 for the stimulation of growth in patients with short stature of various causes (45). In a case study, a  
447 disruption of the IGF system in patient was associated with microcephaly, growth retardation, and  
448 intellectual disability (46). Using a mice model with IGF-1 gene knockout, animal presented with  
449 microcephaly and demyelination in the whole brain (47), whereas overexpression of IGF-1 was  
450 shown to cause macrocephaly. The concentrations of IGF-1 in the cerebral spinal fluid have been  
451 correlated with brain growth in autistic children (48, 49) while low values of IGF-1 have been  
452 reported in a number of serious neurologic diseases of children (50). Since levels of IGF-1 was  
453 significantly reduced in  $Atg6^{+/-}$  brain recovered in pups at 3 weeks of age (Fig. 3C), this may be

454 another underlying factor associated with the phenotype detected in our *in vivo* infectious model  
455 while autophagy is required for proper functionality (51, 52).

456 As noted above, a lack of viral RNA was detected in postmortem brains recovered in 3-week-  
457 old pups, which led to subsequent *in vitro* studies, to determine the significance of the secreted  
458 proteins in the pathology of ZIKV. Presence of viral proteins in the central nervous system can cause  
459 neuroinflammation, glial dysfunction, excitotoxicity, and neuronal death (17, 53). Glia have been  
460 found to play key roles in neuroinflammation, and although this is a normal and necessary process,  
461 emerging evidence in animal models suggests that sustained inflammatory responses by glia can  
462 contribute to disease progression (54, 55) and possibly considered as a general underlying factor  
463 associated with the phenotype detected in our *in vivo* infectious model. Although the *in vitro* data  
464 does not necessarily support the causal factors detected in the *in vivo* studies, the *in vitro* data does  
465 confirm that our mouse model can be infected with three isolates of ZIKV and that attenuated Beclin1  
466 is associated with an increase in viral replication (Fig. 4B) which correlated with an increase in viral-  
467 induced chemokine (Fig. 4C) and viral protein-induced cytokine secretion (Fig. 4D).

468 In summary, we showed (i) infectivity of three different ZIKV isotypes using a conventional  
469 mouse model and (ii) we showed growth impairment in Beclin1-deficient pups exposed to ZKIV-  
470 R103451 *in utero* without detection of viral RNA in pups; suggesting that while ZIKV itself can  
471 cause disease there are other factors and probably an indirect role of Beclin1 and the autophagy  
472 pathway associated in ZIKV infection and pathology.

473

## 474 REFERENCES

- 475 1. de Araujo TVB, Rodrigues LC, de Alencar Ximenes RA, de Barros Miranda-Filho D,  
476 Montarroyos UR, de Melo APL, Valongueiro S, de Albuquerque M, Souza WV, Braga C,  
477 Filho SPB, Cordeiro MT, Vazquez E, Di Cavalcanti Souza Cruz D, Henriques CMP, Bezerra  
478 LCA, da Silva Castanha PM, Dhaliya R, Marques-Junior ETA, Martelli CMT, investigators  
479 from the Microcephaly Epidemic Research G, Brazilian Ministry of H, Pan American Health  
480 O, Instituto de Medicina Integral Professor Fernando F, State Health Department of P. 2016.  
481 Association between Zika virus infection and microcephaly in Brazil, January to May, 2016:  
482 preliminary report of a case-control study. *Lancet Infect Dis* 16:1356-1363.
- 483 2. Jaenisch T, Rosenberger KD, Brito C, Brady O, Brasil P, Marques ET. 2017. Risk of  
484 microcephaly after Zika virus infection in Brazil, 2015 to 2016. *Bull World Health Organ*  
485 95:191-198.
- 486 3. Parra B, Lizarazo J, Jimenez-Arango JA, Zea-Vera AF, Gonzalez-Manrique G, Vargas J,  
487 Angarita JA, Zuniga G, Lopez-Gonzalez R, Beltran CL, Rizcala KH, Morales MT, Pacheco O,  
488 Ospina ML, Kumar A, Cornblath DR, Munoz LS, Osorio L, Barreras P, Pardo CA. 2016.  
489 Guillain-Barre Syndrome Associated with Zika Virus Infection in Colombia. *N Engl J Med*  
490 375:1513-1523.
- 491 4. Mlakar J, Korva M, Tul N, Popovic M, Poljsak-Prijatelj M, Mraz J, Kolenc M, Resman Rus  
492 K, Vesnaver Vipotnik T, Fabjan Vodusek V, Vizjak A, Pizem J, Petrovec M, Avsic Zupanc T.  
493 2016. Zika Virus Associated with Microcephaly. *N Engl J Med* 374:951-8.
- 494 5. Rasmussen SA, Jamieson DJ, Honein MA, Petersen LR. 2016. Zika Virus and Birth Defects--  
495 Reviewing the Evidence for Causality. *N Engl J Med* 374:1981-7.
- 496 6. Dick GW, Kitchen SF, Haddow AJ. 1952. Zika virus. I. Isolations and serological specificity.  
497 *Trans R Soc Trop Med Hyg* 46:509-20.
- 498 7. Barbelanne M, Tsang WY. 2014. Molecular and cellular basis of autosomal recessive primary  
499 microcephaly. *Biomed Res Int* 2014:547986.
- 500 8. Li C, Xu D, Ye Q, Hong S, Jiang Y, Liu X, Zhang N, Shi L, Qin CF, Xu Z. 2016. Zika Virus  
501 Disrupts Neural Progenitor Development and Leads to Microcephaly in Mice. *Cell Stem Cell*  
502 19:120-6.
- 503 9. Tang H, Hammack C, Ogden SC, Wen Z, Qian X, Li Y, Yao B, Shin J, Zhang F, Lee EM,  
504 Christian KM, Didier RA, Jin P, Song H, Ming GL. 2016. Zika Virus Infects Human Cortical  
505 Neural Progenitors and Attenuates Their Growth. *Cell Stem Cell* 18:587-90.
- 506 10. Zhang F, Hammack C, Ogden SC, Cheng Y, Lee EM, Wen Z, Qian X, Nguyen HN, Li Y, Yao  
507 B, Xu M, Xu T, Chen L, Wang Z, Feng H, Huang WK, Yoon KJ, Shan C, Huang L, Qin Z,  
508 Christian KM, Shi PY, Xu M, Xia M, Zheng W, Wu H, Song H, Tang H, Ming GL, Jin P.  
509 2016. Molecular signatures associated with ZIKV exposure in human cortical neural  
510 progenitors. *Nucleic Acids Res* 44:8610-8620.
- 511 11. Faheem M, Naseer MI, Rasool M, Chaudhary AG, Kumosani TA, Ilyas AM, Pushparaj P,  
512 Ahmed F, Algahtani HA, Al-Qahtani MH, Saleh Jamal H. 2015. Molecular genetics of human  
513 primary microcephaly: an overview. *BMC Med Genomics* 8 Suppl 1:S4.
- 514 12. Gilmore EC, Walsh CA. 2013. Genetic causes of microcephaly and lessons for neuronal  
515 development. *Wiley Interdiscip Rev Dev Biol* 2:461-78.
- 516 13. Ojha CR, Rodriguez M, Karuppan MKM, Lapierre J, Kashanchi F, El-Hage N. 2019. Toll-like  
517 receptor 3 regulates Zika virus infection and associated host inflammatory response in primary  
518 human astrocytes. *PLoS One* 14:e0208543.
- 519 14. Klionsky DJ, Baehrecke EH, Brumell JH, Chu CT, Codogno P, Cuervo AM, Debnath J,  
520 Deretic V, Elazar Z, Eskelinen EL, Finkbeiner S, Fueyo-Margareto J, Gewirtz D, Jaattela M,  
521 Kroemer G, Levine B, Melia TJ, Mizushima N, Rubinsztein DC, Simonsen A, Thorburn A,  
522 Thumm M, Tooze SA. 2011. A comprehensive glossary of autophagy-related molecules and  
523 processes (2nd edition). *Autophagy* 7:1273-94.



- 524 15. Lapierre J, Rodriguez M, Ojha CR, El-Hage N. 2018. Critical Role of Beclin1 in HIV Tat and  
525 Morphine-Induced Inflammation and Calcium Release in Glial Cells from Autophagy  
526 Deficient Mouse. *J Neuroimmune Pharmacol* 13:355-370.
- 527 16. Rodriguez M, Kaushik A, Lapierre J, Dever SM, El-Hage N, Nair M. 2017. Electro-Magnetic  
528 Nano-Particle Bound Beclin1 siRNA Crosses the Blood-Brain Barrier to Attenuate the  
529 Inflammatory Effects of HIV-1 Infection in Vitro. *J Neuroimmune Pharmacol* 12:120-132.
- 530 17. Rodriguez M, Lapierre J, Ojha CR, Kaushik A, Batrakova E, Kashanchi F, Dever SM, Nair M,  
531 El-Hage N. 2018. Author Correction: Intranasal drug delivery of small interfering RNA  
532 targeting Beclin1 encapsulated with polyethylenimine (PEI) in mouse brain to achieve HIV  
533 attenuation. *Scientific reports* 8:4778-4778.
- 534 18. Gurwell JA, Nath A, Sun Q, Zhang J, Martin KM, Chen Y, Hauser KF. 2001. Synergistic  
535 neurotoxicity of opioids and human immunodeficiency virus-1 Tat protein in striatal neurons  
536 in vitro. *Neuroscience* 102:555-63.
- 537 19. Macdonald J, Tonry J, Hall RA, Williams B, Palacios G, Ashok MS, Jabado O, Clark D, Tesh  
538 RB, Briese T, Lipkin WI. 2005. NS1 protein secretion during the acute phase of West Nile  
539 virus infection. *J Virol* 79:13924-33.
- 540 20. Yu C, Wang L, Lv B, Lu Y, Zeng Le, Chen Y, Ma D, Shi T, Wang L. 2008. TMEM74, a  
541 lysosome and autophagosome protein, regulates autophagy. *Biochemical and Biophysical  
542 Research Communications* 369:622-629.
- 543 21. Tripathi S, Balasubramaniam VR, Brown JA, Mena I, Grant A, Bardina SV, Maringer K,  
544 Schwarz MC, Maestre AM, Sourisseau M, Albrecht RA, Krammer F, Evans MJ, Fernandez-  
545 Sesma A, Lim JK, Garcia-Sastre A. 2017. A novel Zika virus mouse model reveals strain  
546 specific differences in virus pathogenesis and host inflammatory immune responses. *PLoS  
547 Pathog* 13:e1006258.
- 548 22. Lazear HM, Govero J, Smith AM, Platt DJ, Fernandez E, Miner JJ, Diamond MS. 2016. A  
549 Mouse Model of Zika Virus Pathogenesis. *Cell Host Microbe* 19:720-30.
- 550 23. Wu KY, Zuo GL, Li XF, Ye Q, Deng YQ, Huang XY, Cao WC, Qin CF, Luo ZG. 2016.  
551 Vertical transmission of Zika virus targeting the radial glial cells affects cortex development  
552 of offspring mice. *Cell Res* 26:645-54.
- 553 24. Schweighardt B, Atwood WJ. 2001. Glial cells as targets of viral infection in the human  
554 central nervous system, p 721-735, *Progress in Brain Research*, vol 132. Elsevier.
- 555 25. Furr SR, Marriott I. 2012. Viral CNS infections: role of glial pattern recognition receptors in  
556 neuroinflammation. *Frontiers in Microbiology* 3:201.
- 557 26. Anfasa F, Siegers JY, van der Kroeg M, Mumtaz N, Stalin Raj V, de Vrij FMS, Widagdo W,  
558 Gabriel G, Salinas S, Simonin Y, Reusken C, Kushner SA, Koopmans MPG, Haagmans B,  
559 Martina BEE, van Riel D. 2017. Phenotypic Differences between Asian and African Lineage  
560 Zika Viruses in Human Neural Progenitor Cells. *mSphere* 2.
- 561 27. Alcon S, Talarmin A, Debruyne M, Falconar A, Deubel V, Flamand M. 2002. Enzyme-linked  
562 immunosorbent assay specific to Dengue virus type 1 nonstructural protein NS1 reveals  
563 circulation of the antigen in the blood during the acute phase of disease in patients  
564 experiencing primary or secondary infections. *J Clin Microbiol* 40:376-81.
- 565 28. Libraty DH, Young PR, Pickering D, Endy TP, Kalayanaroj S, Green S, Vaughn DW,  
566 Nisalak A, Ennis FA, Rothman AL. 2002. High circulating levels of the dengue virus  
567 nonstructural protein NS1 early in dengue illness correlate with the development of dengue  
568 hemorrhagic fever. *J Infect Dis* 186:1165-8.
- 569 29. Cao B, Parnell LA, Diamond MS, Mysorekar IU. 2017. Inhibition of autophagy limits vertical  
570 transmission of Zika virus in pregnant mice. *J Exp Med* 214:2303-2313.
- 571 30. Ferdin J, Goricar K, Dolzan V, Plemenitas A, Martin JN, Peterlin BM, Deeks SG, Lenassi M.  
572 2018. Viral protein Nef is detected in plasma of half of HIV-infected adults with undetectable  
573 plasma HIV RNA. *PLoS One* 13:e0191613.

- 574 31. Merfeld E, Ben-Avi L, Kennon M, Cerveny KL. 2017. Potential mechanisms of Zika-linked  
575 microcephaly. *Wiley Interdiscip Rev Dev Biol* 6.
- 576 32. Nicholas AK, Khurshid M, Désir J, Carvalho OP, Cox JJ, Thornton G, Kausar R, Ansar M,  
577 Ahmad W, Verloes A, Passemard S, Misson J-P, Lindsay S, Gergely F, Dobyns WB, Roberts  
578 E, Abramowicz M, Woods CG. 2010. WDR62 is associated with the spindle pole and is  
579 mutated in human microcephaly. *Nature genetics* 42:1010-1014.
- 580 33. Yu TW, Mochida GH, Tischfield DJ, Sgaier SK, Flores-Sarnat L, Sergi CM, Topçu M,  
581 McDonald MT, Barry BJ, Felie J, Sunu C, Dobyns WB, Folkerth RD, Barkovich AJ, Walsh  
582 CA. 2010. Mutations in WDR62, encoding a centrosome-associated protein, cause  
583 microcephaly with simplified gyri and abnormal cortical architecture. *Nature genetics*  
584 42:1015-1020.
- 585 34. Chen J-F, Zhang Y, Wilde J, Hansen KC, Lai F, Niswander L. 2014. Microcephaly disease  
586 gene Wdr62 regulates mitotic progression of embryonic neural stem cells and brain size.  
587 *Nature Communications* 5:3885.
- 588 35. Szczepanski S, Hussain MS, Sur I, Altmüller J, Thiele H, Abdullah U, Waseem SS, Moawia  
589 A, Nürnberg G, Noegel AA, Baig SM, Nürnberg P. 2016. A novel homozygous splicing  
590 mutation of CASC5 causes primary microcephaly in a large Pakistani family. *Human Genetics*  
591 135:157-170.
- 592 36. Mathew R, Kongara S, Beaudoin B, Karp CM, Bray K, Degenhardt K, Chen G, Jin S, White  
593 E. 2007. Autophagy suppresses tumor progression by limiting chromosomal instability. *Genes  
594 & Development* 21:1367-1381.
- 595 37. Zhao Z, Oh S, Li D, Ni D, Pirooz Sara D, Lee J-H, Yang S, Lee J-Y, Ghazalli I, Costanzo V,  
596 Stark Jeremy M, Liang C. 2012. A Dual Role for UVRAG in Maintaining Chromosomal  
597 Stability Independent of Autophagy. *Developmental Cell* 22:1001-1016.
- 598 38. Kadir R, Harel T, Markus B, Perez Y, Bakhrat A, Cohen I, Volodarsky M, Feintsein-Linial M,  
599 Chervinski E, Zlotogora J, Sivan S, Birnbaum RY, Abdu U, Shalev S, Birk OS. 2016. ALFY-  
600 Controlled DVL3 Autophagy Regulates Wnt Signaling, Determining Human Brain Size.  
601 *PLOS Genetics* 12:e1005919.
- 602 39. Boland B, Kumar A, Lee S, Platt FM, Wegiel J, Yu WH, Nixon RA. 2008. Autophagy  
603 induction and autophagosome clearance in neurons: relationship to autophagic pathology in  
604 Alzheimer's disease. *J Neurosci* 28:6926-37.
- 605 40. Chiramel AI, Best SM. 2018. Role of autophagy in Zika virus infection and pathogenesis.  
606 *Virus Res* 254:34-40.
- 607 41. Rodriguez M, Lapierre J, Ojha CR, Estrada-Bueno H, Dever SM, Gewirtz DA, Kashanchi F,  
608 El-Hage N. 2017. Importance of Autophagy in Mediating Human Immunodeficiency Virus  
609 (HIV) and Morphine-Induced Metabolic Dysfunction and Inflammation in Human Astrocytes.  
610 *Viruses* 9.
- 611 42. Houtman J, Freitag K, Gimber N, Schmoranz J, Heppner FL, Jendrach M. 2019. Beclin1-  
612 driven autophagy modulates the inflammatory response of microglia via NLRP3. *EMBO J* 38.
- 613 43. Dever SM, Rodriguez M, Lapierre J, Costin BN, El-Hage N. 2015. Differing roles of  
614 autophagy in HIV-associated neurocognitive impairment and encephalitis with implications  
615 for morphine co-exposure. *Front Microbiol* 6:653.
- 616 44. Cao B, Parnell LA, Diamond MS, Mysorekar IU. 2017. Inhibition of autophagy limits vertical  
617 transmission of Zika virus in pregnant mice. *The Journal of Experimental Medicine* 214:2303-  
618 2313.
- 619 45. Ranke MB, Wolfle J, Schnabel D, Bettendorf M. 2009. Treatment of dwarfism with  
620 recombinant human insulin-like growth factor-1. *Dtsch Arztebl Int* 106:703-9.
- 621 46. Giabicani E, Chantot-Bastaraud S, Bonnard A, Rachid M, Whalen S, Netchine I, Brioude F.  
622 2019. Roles of Type 1 Insulin-Like Growth Factor (IGF) Receptor and IGF-II in Growth

- 623 Regulation: Evidence From a Patient Carrying Both an 11p Paternal Duplication and 15q  
624 Deletion. *Front Endocrinol (Lausanne)* 10:263.
- 625 47. Beck KD, Powell-Braxton L, Widmer HR, Valverde J, Hefti F. 1995. Igf1 gene disruption  
626 results in reduced brain size, CNS hypomyelination, and loss of hippocampal granule and  
627 striatal parvalbumin-containing neurons. *Neuron* 14:717-30.
- 628 48. Riikonen R, Makkonen I, Vanhala R, Turpeinen U, Kuikka J, Kokki H. 2006. Cerebrospinal  
629 fluid insulin-like growth factors IGF-1 and IGF-2 in infantile autism. *Dev Med Child Neurol*  
630 48:751-5.
- 631 49. Riikonen R. 2006. Insulin-like growth factor delivery across the blood-brain barrier. Potential  
632 use of IGF-1 as a drug in child neurology. *Chemotherapy* 52:279-81.
- 633 50. Riikonen R. 2017. Insulin-Like Growth Factors in the Pathogenesis of Neurological Diseases  
634 in Children. *Int J Mol Sci* 18.
- 635 51. Badadani M. 2012. Autophagy Mechanism, Regulation, Functions, and Disorders %J *ISRN*  
636 *Cell Biology*. 2012:11.
- 637 52. Zhao Z, Yang M, Azar SR, Soong L, Weaver SC, Sun J, Chen Y, Rossi SL, Cai J. 2017. Viral  
638 Retinopathy in Experimental Models of Zika Infection. *Invest Ophthalmol Vis Sci* 58:4355-  
639 4365.
- 640 53. Toborek M, Lee YW, Pu H, Malecki A, Flora G, Garrido R, Hennig B, Bauer HC, Nath A.  
641 2003. HIV-Tat protein induces oxidative and inflammatory pathways in brain endothelium. *J*  
642 *Neurochem* 84:169-79.
- 643 54. Glass CK, Saijo K, Winner B, Marchetto MC, Gage FH. 2010. Mechanisms underlying  
644 inflammation in neurodegeneration. *Cell* 140:918-34.
- 645 55. Jha MK, Jeon S, Suk K. 2012. Glia as a Link between Neuroinflammation and Neuropathic  
646 Pain. *Immune Netw* 12:41-7.

647

## 648 **ACKNOWLEDGEMENTS**

649 Dr. Nazira El-Hage received funding from the Florida Department of Health  
650 (<http://www.floridahealth.gov/>) award number 7ZK09 and the National Institutes of Health  
651 (<https://www.nih.gov/>) grant number DA036154. The funders had no role in study design, data  
652 collection and analysis, decision to publish, or preparation of the manuscript. We acknowledge Mr.  
653 Hary Estrada-Bueno (Senior Laboratory Technician) who assisted with the timed pregnancy set-up.  
654 We also acknowledge the university graduate school of FIU for the presidential fellowship and the  
655 dissertation year fellowship provided to Mr. Chet Raj Ojha.

656

## 657 **FOOTNOTES**

### 658 **CONFLICTS OF INTEREST**

659 There are no conflicts of interest to disclosure.

### 660 **FUNDING**

661 This work was supported by Florida Department of Health (<http://www.floridahealth.gov/>) award  
662 number 7ZK09 and the National Institutes of Health (<https://www.nih.gov/>) grant number  
663 DA036154.

664 **CORRESPONDING AUTHOR INFORMATION**

665 Dr. Nazira El-Hage, Ph.D., Department of Immunology and Nanomedicine, Florida International  
666 University, Herbert Wertheim College of Medicine, Miami, FL 33199, USA; E-mail address:  
667 nelhage@fiu.edu; Phone: (305)-348-4346; FAX: (305)-348-1109.

668

669 **FIGURE LEGENDS**

670 **Figure 1. ZIKV infection in Atg6<sup>+/+</sup> and Atg6<sup>+/-</sup> pregnant dams.** (A) Representative western blots  
671 probed with antibodies against several autophagy proteins. Adult Atg6<sup>+/+</sup> and Atg6<sup>+/-</sup> brains were  
672 removed postmortem and minced according to Materials and Methods. (B) Densitometric analysis  
673 using image J indicate the levels of Beclin1, ATG5, P62, LC3-I and LC3-II in brains of adult Atg6<sup>+/+</sup>  
674 (black bar) and Atg6<sup>+/-</sup> (brown bar) mice. \**p*<0.05 vs. Atg6<sup>+/+</sup>. (C) Schematic diagram illustrating  
675 ZIKV-infection in timed-pregnant dams. (D) Viral RNA detected in serum collected from ZIKV-  
676 infected dams on E13. \**p*<0.05 vs. Atg6<sup>+/+</sup>. (E) Weight gain, expressed in grams, was measured using  
677 an analytical balance at gestation day 0 and throughout pregnancy at 3 days interval. \**p*<0.05 vs.  
678 Atg6<sup>+/+</sup>. (F) Viral RNA detected in organs removed postmortem from ZIKV-infected dams on E17.  
679 (G) Percent survival rate in pregnant dams infected with ZIKV or mock (PBS) was calculated by  
680 dividing the total number of live animals by the number of live + dead animals X 100. No  
681 significance difference (*p* = 0.179) in R103451-infected dams. \**p*<0.05 vs. mock exposed. (H)  
682 Percent survival in adult AG129 mice infected with ZIKV-MR766 (10<sup>1</sup> to 10<sup>4</sup> PFU/mL). Error bars  
683 show mean ± SEM for N= 5 - 8 animals per treatment. The data were analyzed using GraphPad Prism  
684 and two-way ANOVA followed by Tukey's test. \* indicates *p*<0.05 and \*\* indicates *p*<0.01. Viral  
685 RNA is expressed on a log10 scale after comparison with a standard curve produced using serial 10-  
686 fold dilutions of ZIKV RNA from known quantities of infectious virus.

687

688 **Figure 2. Growth impairment in pups born to ZIKV-R103451-infected dams.**

689 (A) Viral RNA was measured in postmortem fetuses collected on E17 from Atg6<sup>+/+</sup> and Atg6<sup>+/-</sup> dams  
690 infected with ZIKV. (B) Percent survival rate in pups born to ZIKV-infected dams was calculated  
691 using the total number animals subtracted by the dead pups X 100. (C) Representative image of a  
692 litter born to ZIKV-R103451 Atg6<sup>+/-</sup> dam containing both Atg6<sup>+/+</sup> and Atg6<sup>+/-</sup> pups. Smaller pup is  
693 shown in a circle at day 7, with an arrow at day 10, and at day 14, the smaller sized pup becomes  
694 more noticeable when compared to the regular sized sibling (Top panel). Body weight (middle chart)  
695 and body length (bottom chart) profile of Atg6<sup>+/+</sup> and Atg6<sup>+/-</sup> pups born from mock and ZIKV  
696 infected dams. Body weight was measured using a balance and expressed in grams while body length

697 was measured using a caliper and expressed in centimeter. (D) Representative images of 3-week-old  
698 pups born from ZIKV-R103451-infected (top) and mock (bottom) infected dams are shown in Fig.  
699 2D. Respective skull and brain images are shown on the right-hand side. Brain recovered from the  
700 small pups born to ZIKV-R103451-infected dams are labeled 3 and 4, while brain recovered from the  
701 typical sized pups born to ZIKV-R103451-infected dams are labeled 1 and 2. Brain recovered from  
702 the typical sized pups born to mock-infected dams are labeled 5-8. (E) Brains weight in milligrams  
703 are represented in bar graph (top) and in a chart (bottom). Error bars show mean  $\pm$  SEM for N = 64  
704 (Atg6<sup>+/+</sup>) and N = 48 (Atg6<sup>+/-</sup>) pups used. The data were analyzed using Two-way ANOVA followed  
705 by Tukey's test for multiple comparison. \* $p < 0.05$  vs. mock-infected Atg6<sup>+/+</sup> strain, whereas, # $p < 0.05$   
706 vs. mock infected Atg6<sup>+/-</sup> strain. Viral RNA is expressed on a log10 scale after comparison with a  
707 standard curve produced using serial 10-fold dilutions of ZIKV RNA from known quantities of  
708 infectious virus.

709

710 **Figure 3. Reduced expression of microcephalic genes in brain of pups exposed *in-utero* to ZIKV.**

711 (A) Three weeks post-birth, pups born to ZIKV-infected and mock-exposed dams were sacrificed and  
712 brains removed postmortem were embedded in OCT and used for imaging analysis. Representative  
713 images of brain tissues from pups exposed to mock (top panel) and ZIKV (bottom panel) *in utero*,  
714 labeled with MAP2 expressing neurons (indicated with red fluorescent color), NS1 (left) and E  
715 (right) (arrows: indicated with green fluorescent color) and the blue color indicates DAPI-labeled  
716 nuclei. (B) Hematoxylin & Eosin (H&E) staining of brains removed postmortem from pups exposed  
717 to mock (left panel) and ZIKV (right panel) *in utero*. Images were acquired using an inverted  
718 fluorescence microscope with a 560 Axiovision camera using 40X magnification (Zeiss). Neurons,  
719 dendrites, glia and necrosis are indicated by arrows. (C) The other half of the brain tissues were  
720 minced and used to measure autophagy related genes and growth factors in Atg6<sup>+/+</sup> (black bar) and  
721 Atg6<sup>+/-</sup> (brown bar) pups exposed to ZIKV-R103451 *in utero*, by RT-PCR. Results are expressed as  
722 fold change from control (increase or decrease). (D) RNA expression of the microcephaly associated  
723 genes (MCPH1, ASPM, WDR62, and CASC5) were measured by RT-PCR in Atg6<sup>+/+</sup> (black bar) and  
724 Atg6<sup>+/-</sup> (brown bar) pups exposed to mock and ZIKV-R103451 *in utero*. Expression levels are relative  
725 to Atg6<sup>+/+</sup> pups born from wild type mice and normalized to GAPDH. Error bars show mean  $\pm$  SEM  
726 for N = 64 (Atg6<sup>+/+</sup>), N = 48 (Atg6<sup>+/-</sup>) pups. The data were analyzed by Two-way ANOVA followed  
727 by Tukey's multiple comparison test. \* $p < 0.05$  vs. respective mock infected strain, # $p < 0.05$  vs. Atg6<sup>+/+</sup>

728 **Figure 4. ZIKV infects mixed mouse glia and induces inflammatory molecules. (A)**

729 Representative immunofluorescent images of mouse mixed glia derived from Atg6<sup>+/+</sup> and Atg6<sup>+/-</sup>

730 pups infected ZIKV and labeled with the antibody against GFAP (red), ZIKV NS1 (green) and DAPI  
731 nucleus (blue). Images were acquired using an inverted fluorescence microscope with a 560  
732 Axiovision camera and a 40X magnification (Zeiss). (B) Viral infection and PFU were analyzed  
733 using plaque assays (top) and data are illustrated in graph (bottom). Atg6<sup>+/+</sup> glia (black bar) and  
734 Atg6<sup>+/-</sup> glia (brown bar). (C) Secretion of RANTES, MCP-1 and IL-6 were detected in glial  
735 supernatants infected with ZIKV at 24, 48- and 72-hours post-infection by ELISA. (D) Secretion of  
736 TNF- $\alpha$  was detected in glial supernatants exposed to 50nM of viral proteins after 8, 24- and 96-hours  
737 by ELISA. Atg6<sup>+/+</sup> glia (black bar) and Atg6<sup>+/-</sup> glia (brown bar). Error bars show mean  $\pm$  SEM for 3  
738 independent experiments. The data were analyzed by Two-way ANOVA followed by Tukey's  
739 multiple comparison test. \* $p$ <0.05 vs. respective media control, # $p$ <0.05 vs. Atg6<sup>+/+</sup>.

740

741

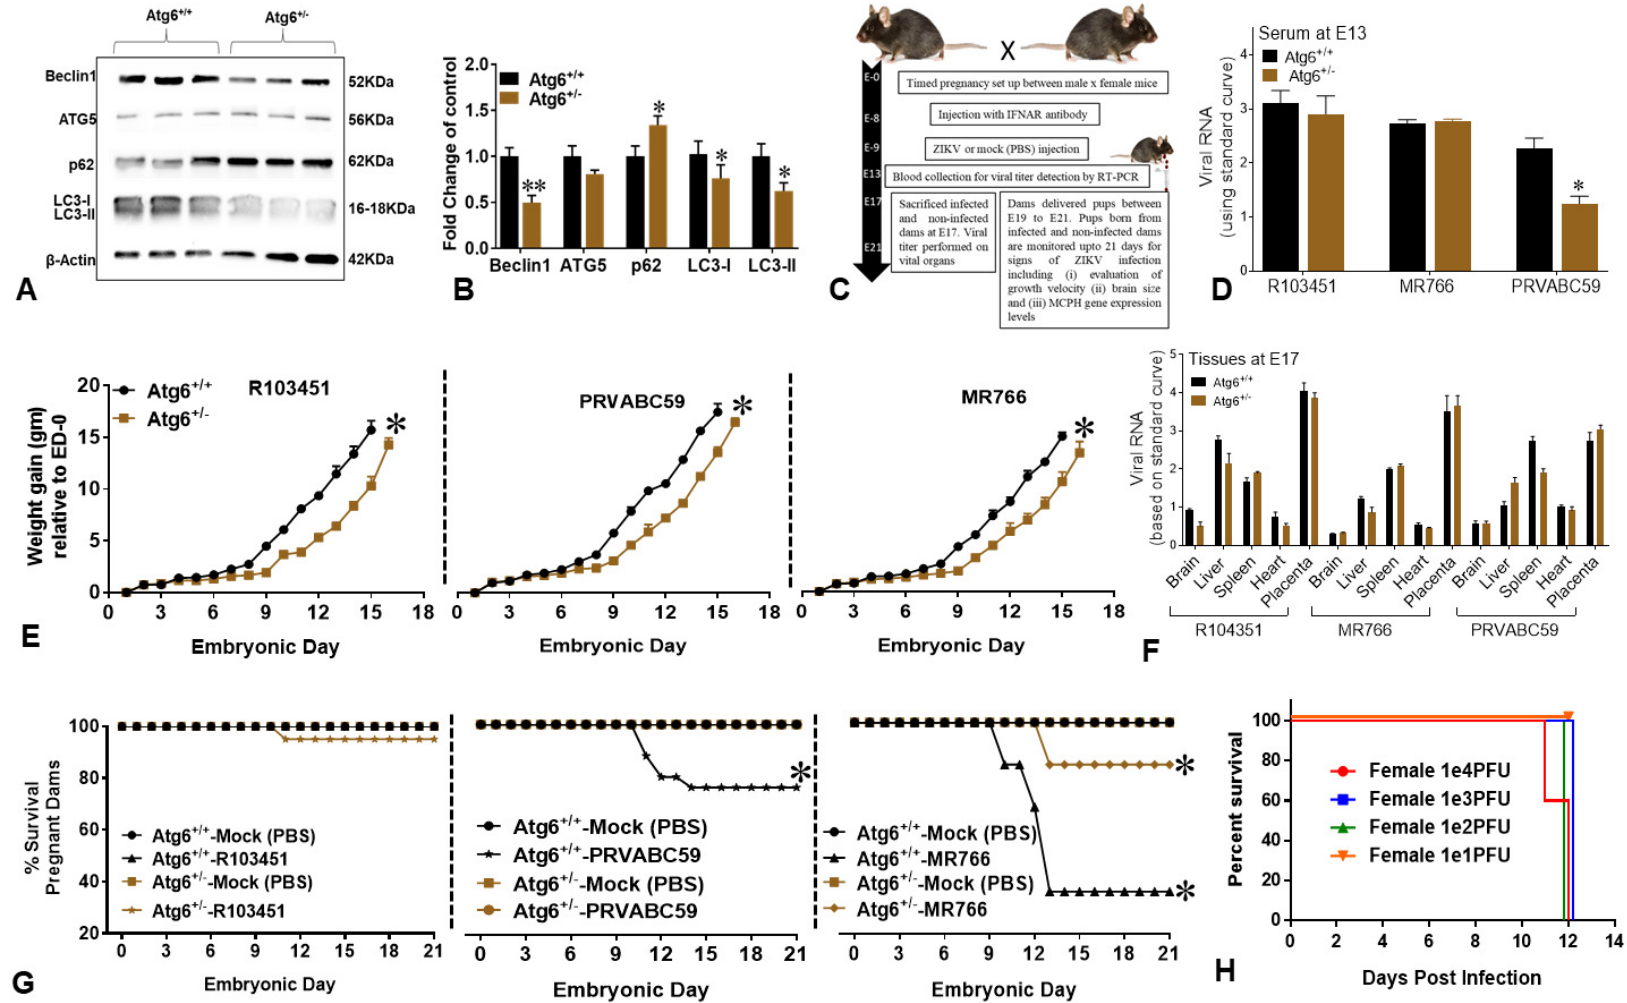

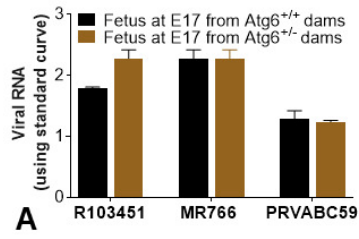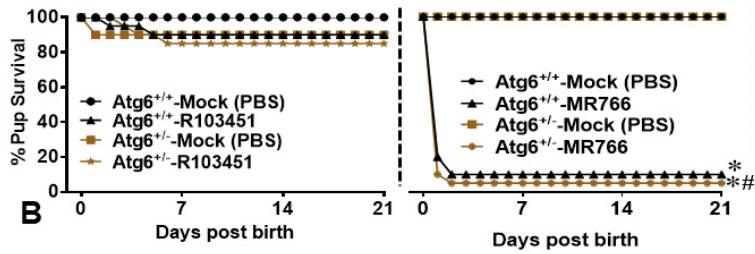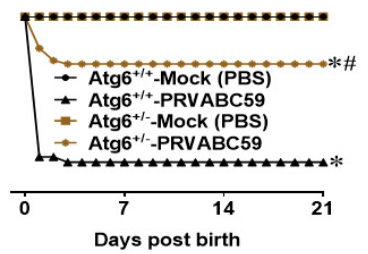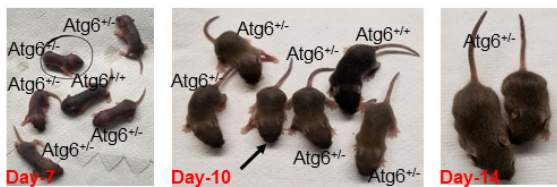

3-week old *Atg6*<sup>-/-</sup> pups born from R103451-infected dams.

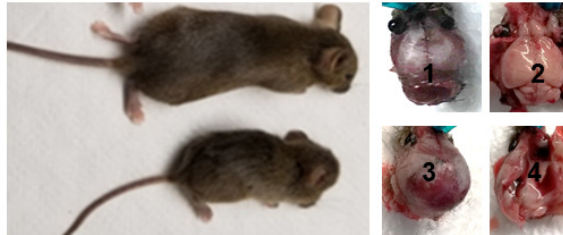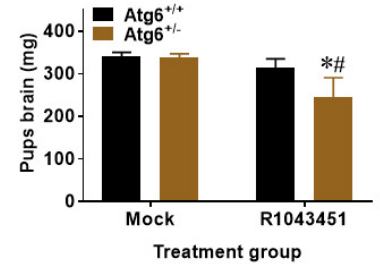

**C**

| Treatment group                      | Day-7        | Day-14                    | Day-21                    |
|--------------------------------------|--------------|---------------------------|---------------------------|
| <i>Atg6</i> <sup>+/+</sup> - Mock    | 2.42 ± 0.033 | 6.26 ± 0.072              | 8.22 ± 0.056              |
| <i>Atg6</i> <sup>+/+</sup> -R103451  | 2.53 ± 0.032 | 6.73 ± 0.064              | 8.27 ± 0.055              |
| <i>Atg6</i> <sup>-/-</sup> - Mock    | 2.40 ± 0.033 | 6.32 ± 0.052              | 7.93 ± 0.050              |
| <i>Atg6</i> <sup>-/-</sup> - R103451 | 2.13 ± 0.049 | 5.43 ± 0.146 <sup>*</sup> | 6.93 ± 0.155 <sup>*</sup> |

3-week old *Atg6*<sup>-/-</sup> pups born from mock-infected dams.

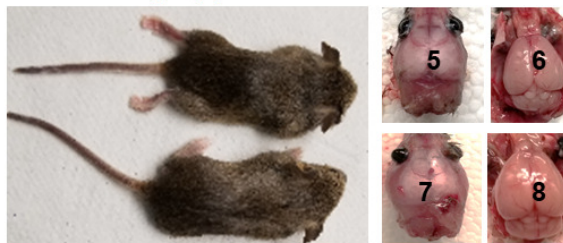

| Treatment group                      | Day-21                     |
|--------------------------------------|----------------------------|
| <i>Atg6</i> <sup>+/+</sup> - Mock    | 340.3 ± 2.9                |
| <i>Atg6</i> <sup>+/+</sup> -R103451  | 313.9 ± 6.4                |
| <i>Atg6</i> <sup>-/-</sup> - Mock    | 338.7 ± 2.4                |
| <i>Atg6</i> <sup>-/-</sup> - R103451 | 262.3 ± 10.6 <sup>*#</sup> |

**C**

**D**

**E**



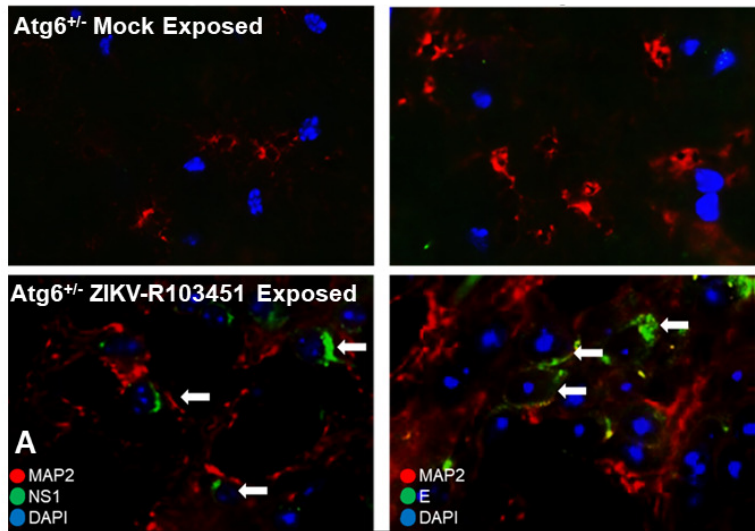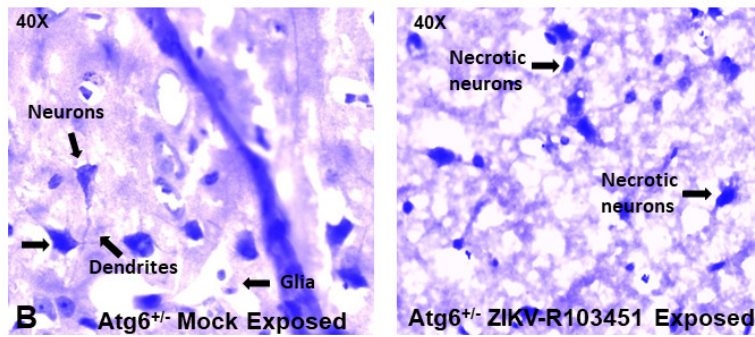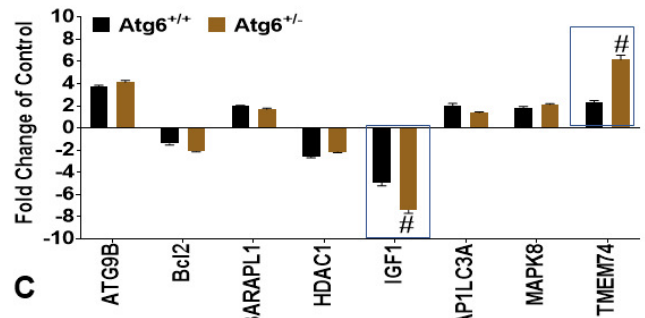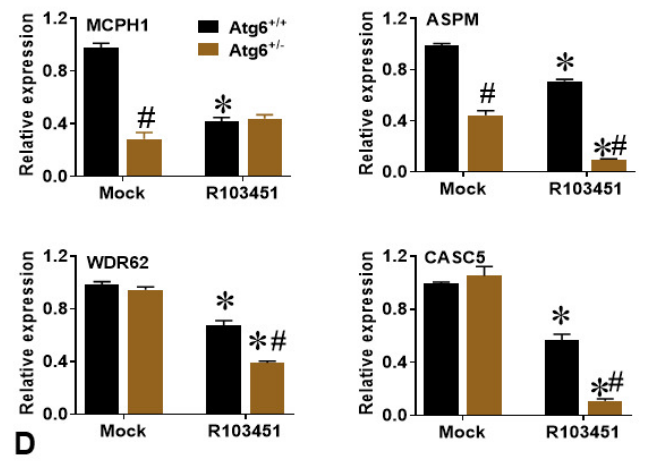

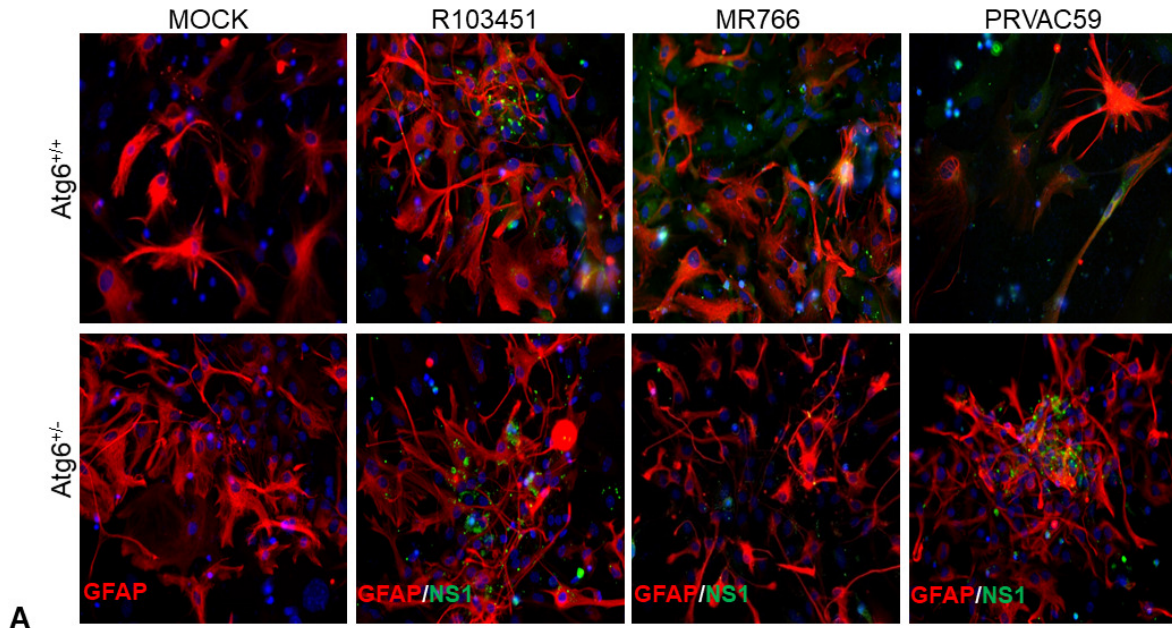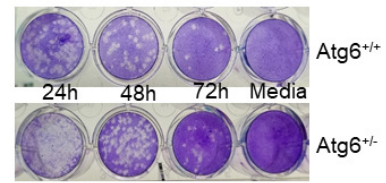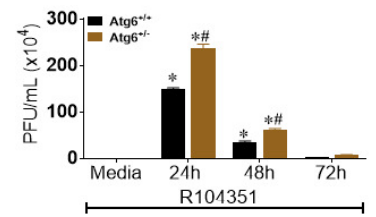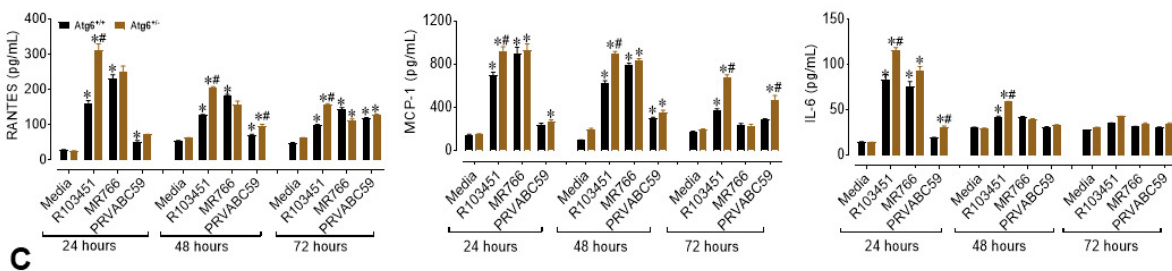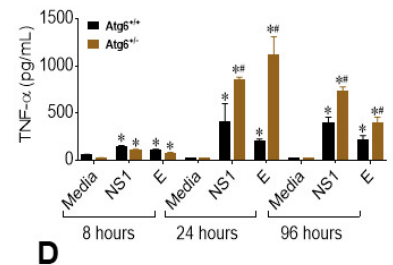

Source: https://www.biorxiv.org/content/10.1101/843813v1.full.pdf
